# Supplementary material for: Efficient gas–liquid contact using microfluidic membrane devices with staggered herringbone mixers
Source: Royal Society of Chemistry journal article supplement (doi:10.1039/c5lc00428d), 2015-01-01
Supplement: c5lc00428d1.pdf [file c5lc00428d1.pdf]

## Supporting information for:

# Efficient gas-liquid contacting using microfluidic membrane devices with staggered herring bone mixers

T. Femmer, M.L. Eggersdorfer, A.J.C. Kuehne and M. Wessling

From the CFD simulations in Comsol we show different flow vizualizations. Stream lines of the SHM channel topology are given in Fig.1. The stream lines are colored blue in the black SHM channels positioned at half of the channel length. Depicted are Reynolds Numbers of 10, 2.3 and 1 in isomeric, xy and yz-plane, indicated by the coordinate system.

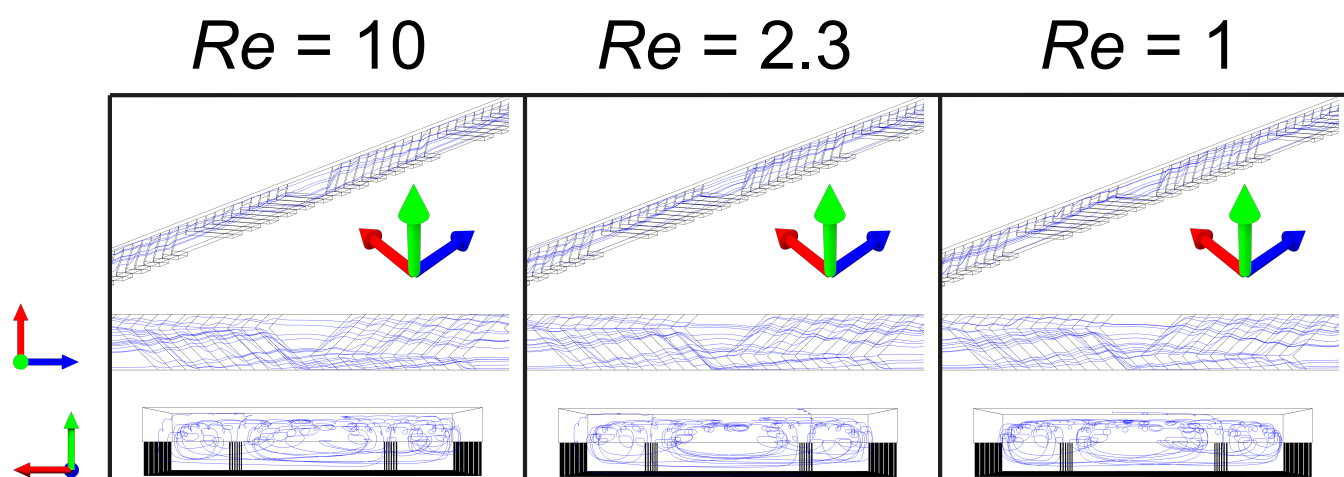

**Fig. 1** SHM flow profile for Re 10, 2.3 and 1 in different view planes at half of the channel length. Stream lines are coloured blue while the channel is depicted black. A coordinate system is added to indicate the channel orientation.
